# Supplementary material for: Development of a SNP barcode to genotype Babesia microti infections
Source: PubMed Central journal article supplement (PMC6448979; doi:10.1371/journal.pntd.0007194), 2019-03-25
Supplement: pntd.0007194.s001.pdf [file pntd.0007194.s001.pdf]

| Sample Name             | Origin  | Babesia (+/-) | CT Mean and Standard Error |
|-------------------------|---------|---------------|----------------------------|
| <i>Bab01</i>            | MA      | +             | 20.92 ± 0.2                |
| <i>Bab02</i>            | MA      | +             | 17.725 ± 0.23              |
| <i>Bab03</i>            | MA      | +             | 15.87 ± 0.029              |
| <i>Bab04</i>            | MA      | +             | 24.31 ± 0.73               |
| <i>Bab05</i>            | NH      | +             | 14.32 ± 0.06               |
| <i>Bab06</i>            | Unknown | +             | 18.28 ± 0.01               |
| <i>Bab07</i>            | Unknown | +             | 18.14 ± 0.32               |
| <i>Bab08</i>            | Unknown | +             | 21.74 ± 0.08               |
| <i>Bab10</i>            | CT      | +             | 17.39 ± 0.04               |
| <i>Bab11</i>            | MA      | +             | 18.42 ± 0.01               |
| <i>Bab12</i>            | MA      | +             | 18.07 ± 0.08               |
| <i>Bab13</i>            | ME      | +             | 16.98 ± 0.04               |
| <i>Bab14</i>            | MA      | +             | 19.5 ± 0.14                |
| <i>Bab15</i>            | MA      | +             | 17.13 ± 0.42               |
| <i>Bab16</i>            | MA      | +             | 18.75 ± 0.01               |
| <i>Gray</i>             | Nan     | +             | 16.33 ± 0.18               |
| <i>Peabody</i>          | Nan     | +             | 15.39 ± 0.27               |
| <i>RMNS-1</i>           | Nan     | +             | 13.44 ± 0.30               |
| <i>GI1990</i>           | Nan     | +             | 15.77 ± 0.09               |
| <i>GI1986</i>           | Nan     | +             | 18.69 ± 0.23               |
| <i>GI2004</i>           | Nan     | +             | 14.77 ± 0.11               |
| <i>RMNS1997</i>         | Nan     | +             | 17.23 ± 0.02               |
| <i>MN-1</i>             | MI      | +             | 18.46 ± 0.16               |
| <i>MNB010</i>           | MI      | +             | 22.47 ± 0.01               |
| <i>ND11</i>             | ND      | +             | 18.71 ± 0.25               |
| <i>W107</i>             | WI      | +             | 22.89 ± 0.05               |
| <i>Lyme borreliosis</i> | Unknown | -             | -                          |
