# Supplementary material for: Development of a SNP barcode to genotype Babesia microti infections
Source: PubMed Central journal article supplement (PMC6448979; doi:10.1371/journal.pntd.0007194), 2019-03-25
Supplement: pntd.0007194.s002.pdf [file pntd.0007194.s002.pdf]

| Barcode Assay | Forward                     | Reverse                        | Forward Primer | Reverse Primer |
|---------------|-----------------------------|--------------------------------|----------------|----------------|
|               | Primer Sequence             | Primer Sequence                | (ng)           | (ng)           |
| 1             | CTAGCTAGGCCGGAGGG           | TGAAACTCGTCCAGCGT              | 200            | 200            |
| 2             | GGGGTGATTTGTATTAATTTAGAGCA  | ATCTCTCCAGGTAAGTTAGTGAC        | 200            | 200            |
| 3             | GTACCTGCTAGCCCCTG           | GAATGTTTCCCAAACCCGC            | 400            | 400            |
| 4             | TCCCGTTGACTCTCCG            | CGTGCCTGTTTGATGTTG             | 400            | 400            |
| 5             | ACAGTCAGCTGTGTGATG          | GAGTCGTTGGTATGAAGTGG           | 400            | 400            |
| 6             | TTCCTCATATGTGGTGCATATGATTA  | AGGAACAATGTGTGTCTCG            | 400            | 400            |
| 7             | GGACCACTACCTAGGGC           | CTACGTCATCTACATGAAATGCT        | 200            | 200            |
| 8             | TCGTGTCTACATTATATCAGAGGGT   | TATTTCCCGTCTAGCCAGC            | 200            | 200            |
| 9             | ACCGTATGTCTGCATTATGTTT      | CAATGTCCCAGACAATAACATCC        | 200            | 200            |
| 10            | ACACGGTGTTAAACTGCAA         | ATACAATTTATCCTAATGATGACGGG     | 200            | 200            |
| 11            | CGCCGTAAGACCACCTC           | CTCTTGCCCTGCAGAC               | 400            | 400            |
| 12            | CTACTGGGGAGCTACGG           | TCCTTTGTTCCAGTAGAACAAGTTA      | 200            | 200            |
| 13            | AATTACCATACATGTTTCTTTAACC   | CTGCACTACAATATACCTACATGTTAATC  | 200            | 200            |
| 14            | AGCTTGAAGTGTATAGGAATGC      | ACACAGATGTTATATAGATAGACCAAGA   | 200            | 200            |
| 15            | AAGAATGAAGTGTATAAAGCTGAGT   | TCATGCAGGTGTATCCTGT            | 200            | 200            |
| 16            | ACTCACTGCACTACAATATACCT     | AATTACCATACATGTTTCTTTAACC      | 200            | 200            |
| 17            | CTACACATATTCTGAGGGATAGTTAG  | CCAAGTGTTTAGCTAGTCTATAACTG     | 200            | 200            |
| 18            | GTCCTATAGTACACCACAAGCA      | AAAGGAGAATGTCTTATCCTTACAAC     | 200            | 200            |
| 19            | TACTCGATAATAGGCAGTGTTATTCT  | CAAGCTAATAAACAGGAGTAATTCAG     | 200            | 200            |
| 20            | CATTGATACGTTAGGATTGACAG     | AATATTAGCATGGGATCATAAAGCTAT    | 200            | 200            |
| 21            | CGCAGAATGCTCTTTAATGTATTT    | ATCTAGTCCTGTACTTTAAGATTAATATCG | 200            | 200            |
| 22            | AGCCATCATCTCTTCATAGCTAC     | TGTCGACTCATCATGGCTTAATTT       | 200            | 200            |
| 23            | AGTACTAGTTATGCAGATACTAACAGG | ACAGCTACATAGTTAAATGACAGTATTAC  | 200            | 200            |
| 24            | AGTCTGCATCTACATGTCTTG       | CCTTACGTAAGTCTAGGTTTCA         | 200            | 200            |
| 25            | AGGAGGTGAACCTTACAAATTTTGTTA | TCTGTTAATACACCTTCATCTAGTACTTG  | 200            | 200            |
| 26            | TAAACCTGAACCAATGAGGGATAG    | GCCAAATCATCCGTGGCA             | 400            | 400            |
| 27            | TAGGAGAATCGCTCCCTGG         | TATGACCGTTACCTGTGAACC          | 400            | 400            |
| 28            | CTAGCATATCCAAGTGCATGTTT     | TCAAGAGTCTCATTGCCTGTTA         | 299            | 200            |
| 29            | GGTCAATTGTTGATGGTCAGT       | GCCGAGAGACGAAAATCC             | 200            | 200            |
| 30            | GTTAGCTTACTGAGCAGGTG        | AAATTATATGCGTTTGTCCAAGAG       | 200            | 200            |
| 31            | TATAGCTCAACTGGATGGTTTATAGAT | GGGCGATAATAAAGGGTAGTG          | 200            | 200            |
| 32            | AGGTTTAGTAACAATGCTAGTGTTTAT | TTGTTCTCTGCTCCACTG             | 200            | 200            |
