# Supplementary material for: Development of a SNP barcode to genotype Babesia microti infections
Source: PubMed Central journal article supplement (PMC6448979; doi:10.1371/journal.pntd.0007194), 2019-03-25
Supplement: pntd.0007194.s003.pdf [file pntd.0007194.s003.pdf]

| Barcode Assay | Cellular Location                      | Genebank ID   reference strain   SNP Position | Amplicon (Size bp) | Reference | Alternate |
|---------------|----------------------------------------|-----------------------------------------------|--------------------|-----------|-----------|
|               | (Nuclear, Mitochondrial, Apicoplastal) |                                               |                    | Allele    | Allele    |
| 1             | nuclear (chromosome 1)                 | gi 399215784 emb FO082871.1 _741112           | 48                 | C         | T         |
| 2             | nuclear (chromosome 1)                 | gi 399215784 emb FO082871.1 _734209           | 57                 | A         | C         |
| 3             | nuclear (chromosome 1)                 | gi 399215784 emb FO082871.1 _1279670          | 51                 | A         | G         |
| 4             | nuclear (chromosome 2)                 | gi 399216479 emb FO082872.1 _779974           | 47                 | C         | T         |
| 5             | nuclear (chromosome 2)                 | gi 399216479 emb FO082872.1 _823467           | 68                 | T         | C         |
| 6             | nuclear (chromosome 2)                 | gi 399216479 emb FO082872.1 _1257020          | 71                 | C         | T         |
| 7             | nuclear (chromosome 2)                 | gi 399216479 emb FO082872.1 _1061756          | 50                 | A         | G         |
| 8             | nuclear (chromosome 2)                 | gi 399216479 emb FO082872.1 _1354157          | 67                 | T         | C         |
| 9             | nuclear (chromosome 3)                 | gi 399217317 emb FO082874.1 _196486           | 59                 | G         | A         |
| 10            | nuclear (chromosome 3)                 | gi 399217317 emb FO082874.1 _1385017          | 61                 | G         | A         |
| 11            | nuclear (chromosome 3)                 | gi 399217317 emb FO082874.1 _1482509          | 45                 | C         | T         |
| 12            | mitochondrial                          | gi 400131493 ref NC_018345.1 _5024            | 49                 | C         | T         |
| 13            | mitochondrial                          | gi 400131493 ref NC_018345.1 _2404            | 73                 | G         | A         |
| 14            | mitochondrial                          | gi 400131493 ref NC_018345.1 _3097            | 73                 | T         | C         |
| 15            | mitochondrial                          | gi 400131493 ref NC_018345.1 _6574            | 50                 | T         | C         |
| 16            | mitochondrial                          | gi 400131493 ref NC_018345.1 _5987            | 73                 | C         | T         |
| 17            | mitochondrial                          | gi 400131493 ref NC_018345.1 _6322            | 58                 | G         | A         |
| 18            | mitochondrial                          | gi 400131493 ref NC_018345.1 _8452            | 64                 | G         | A         |
| 19            | mitochondrial                          | gi 400131493 ref NC_018345.1 _8840            | 54                 | G         | A         |
| 20            | mitochondrial                          | gi 400131493 ref NC_018345.1 _9435            | 83                 | C         | A         |
| 21            | mitochondrial                          | gi 400131493 ref NC_018345.1 _8598            | 70                 | G         | A         |
| 22            | mitochondrial                          | gi 400131493 ref NC_018345.1 _10124           | 50                 | A         | G         |
| 23            | mitochondrial                          | gi 400131493 ref NC_018345.1 _4730            | 57                 | G         | A         |
| 24            | mitochondrial                          | gi 400131493 ref NC_018345.1 _5769            | 62                 | A         | G         |
| 25            | apicoplastal                           | gi 658131431 emb LK028575.1 _18841            | 129                | C         | T         |
| 26            | nuclear (chromosome 1)                 | gi 399215784 emb FO082871.1 _1278869          | 63                 | C         | A         |
| 27            | nuclear (chromosome 2)                 | gi 399216479 emb FO082872.1 _469723           | 60                 | A         | C         |
| 31            | nuclear (chromosome 2)                 | gi 399216479 emb FO082872.1 _522385           | 48                 | G         | A         |
| 28            | nuclear (chromosome 3)                 | gi 399217317 emb FO082874.1 _460856           | 66                 | G         | T         |
| 29            | nuclear (chromosome 3)                 | gi 399217317 emb FO082874.1 _1343398          | 54                 | G         | A         |
| 30            | nuclear (chromosome 3)                 | gi 399217317 emb FO082874.1 _1350472          | 69                 | C         | T         |
| 32            | mitochondrial                          | gi 400131493 ref NC_018345.1 _5474            | 63                 | T         | C         |
