# Supplementary material for: Development of a SNP barcode to genotype Babesia microti infections
Source: PubMed Central journal article supplement (PMC6448979; doi:10.1371/journal.pntd.0007194), 2019-03-25
Supplement: pntd.0007194.s004.pdf [file pntd.0007194.s004.pdf]

| Barcode Assay | Efficiency | $r^2$ | Limit of Detection Total DNA (ng/ $\mu$ l) |
|---------------|------------|-------|--------------------------------------------|
| 1             | 96.38      | 0.992 | 10                                         |
| 2             | 90.07      | 0.993 | 10                                         |
| 3             | 97.79      | 0.994 | 10                                         |
| 4             | 94.78      | 0.996 | 10                                         |
| 5             | 93.74      | 0.998 | 10                                         |
| 6             | 90.80      | 0.999 | 10                                         |
| 7             | 90.63      | 0.997 | 10                                         |
| 8             | 91.78      | 0.999 | 10                                         |
| 9             | 96.91      | 0.984 | 10                                         |
| 10            | 102.33     | 0.908 | 10                                         |
| 11            | 91.33      | 0.999 | 10                                         |
| 12            | 101.54     | 0.993 | 1                                          |
| 13            | 100.25     | 0.997 | 1                                          |
| 14            | 100.57     | 0.974 | 10                                         |
| 15            | 97.57      | 0.952 | 1                                          |
| 16            | 90.70      | 0.990 | 10                                         |
| 17            | 101.29     | 0.957 | 1                                          |
| 18            | 90.92      | 0.997 | 1                                          |
| 19            | 93.22      | 0.997 | 10                                         |
| 20            | 100.93     | 0.994 | 1                                          |
| 21            | 90.08      | 0.993 | 10                                         |
| 22            | 94.89      | 0.999 | 10                                         |
| 23            | 98.82      | 0.996 | 1                                          |
| 24            | 98.46      | 0.988 | 1                                          |
| 25            | 95.29      | 0.995 | 1                                          |
| 26            | 90.13      | 0.991 | 10                                         |
| 27            | 92.92      | 0.993 | 10                                         |
| 28            | 97.66      | 0.993 | 10                                         |
| 29            | 93.55      | 0.991 | 10                                         |
| 30            | 92.26      | 0.992 | 10                                         |
| 31            | 91.44      | 0.978 | 10                                         |
| 32            | 100.12     | 0.942 | 1                                          |
