# Supplementary material for: Development of a SNP barcode to genotype Babesia microti infections
Source: PubMed Central journal article supplement (PMC6448979; doi:10.1371/journal.pntd.0007194), 2019-03-25
Supplement: pntd.0007194.s005.pdf [file pntd.0007194.s005.pdf]

| Barcode Assay | T <sub>m</sub> (°C) Reference Allele | T <sub>m</sub> (°C) Alternate Allele | ΔT <sub>m</sub> (°C) |
|---------------|--------------------------------------|--------------------------------------|----------------------|
| 1             | 87.11 ± 0.10                         | 86.26 ± 0.13                         | 0.85                 |
| 2             | 76.19 ± 0.02                         | 77.19 ± 0.08                         | 1.00                 |
| 3             | 82.60 ± 0.09                         | 83.55 ± 0.12                         | 0.95                 |
| 4             | 83.80 ± 0.11                         | 82.89 ± 0.09                         | 0.91                 |
| 5             | 81.53 ± 0.09                         | 82.49 ± 0.11                         | 0.96                 |
| 6             | 78.84 ± 0.15                         | 77.99 ± 0.06                         | 0.85                 |
| 7             | 80.00 ± 0.08                         | 81.00 ± 0.07                         | 1.00                 |
| 8             | 76.16 ± 0.15                         | 77.28 ± 0.16                         | 1.12                 |
| 9             | 80.40 ± 0.15                         | 81.30 ± 0.11                         | 0.90                 |
| 10            | 77.34 ± 0.12                         | 76.40 ± 0.15                         | 0.94                 |
| 11            | 85.13 ± 0.15                         | 84.20 ± 0.13                         | 0.93                 |
| 12            | 75.93 ± 0.12                         | 74.97 ± 0.13                         | 0.96                 |
| 13            | 74.15 ± 0.06                         | 75.05 ± 0.07                         | 0.90                 |
| 14            | 76.91 ± 0.11                         | 77.73 ± 0.05                         | 0.82                 |
| 15            | 75.49 ± 0.14                         | 76.46 ± 0.10                         | 0.97                 |
| 16            | 75.13 ± 0.09                         | 76.00 ± 0.06                         | 0.87                 |
| 17            | 75.51 ± 0.09                         | 74.45 ± 0.12                         | 1.06                 |
| 18            | 76.00 ± 0.06                         | 75.21 ± 0.09                         | 0.79                 |
| 19            | 74.46 ± 0.13                         | 73.26 ± 0.15                         | 1.20                 |
| 20            | 75.81 ± 0.12                         | 76.64 ± 0.10                         | 0.83                 |
| 21            | 74.81 ± 0.10                         | 75.66 ± 0.10                         | 0.85                 |
| 22            | 75.10 ± 0.14                         | 76.07 ± 0.16                         | 0.97                 |
| 23            | 74.43 ± 0.15                         | 73.52 ± 0.12                         | 0.91                 |
| 24            | 77.38 ± 0.09                         | 78.30 ± 0.03                         | 0.92                 |
| 25            | 74.32 ± 0.18                         | 73.44 ± 0.20                         | 0.88                 |
| 26            | 84.00 ± 0.04                         | 83.47 ± 0.06                         | 0.53                 |
| 27            | 82.21 ± 0.07                         | 83.15 ± 0.11                         | 0.94                 |
| 28            | 79.83 ± 0.04                         | 79.00 ± 0.05                         | 0.83                 |
| 29            | 81.35 ± 0.14                         | 82.30 ± 0.12                         | 0.95                 |
| 30            | 78.63 ± 0.05                         | 77.69 ± 0.13                         | 0.94                 |
| 31            | 76.64 ± 0.15                         | 75.75 ± 0.16                         | 0.89                 |
| 32            | 78.18 ± 0.16                         | 77.38 ± 0.13                         | 0.80                 |
