# Supplementary material for: Development of a SNP barcode to genotype Babesia microti infections
Source: PubMed Central journal article supplement (PMC6448979; doi:10.1371/journal.pntd.0007194), 2019-03-25
Supplement: pntd.0007194.s006.pdf [file pntd.0007194.s006.pdf]

| Sample Name | Origin           | Origin   | 1 | 2 | 3 | 4 | 5 | 6 | 7 | 8 | 9 | 10 | 11 | 12 | 13 | 14 | 15 | 16 | 17 | 18 | 19 | 20 | 21 | 22 | 23 | 24 | 25 | 26 | 27 | 28 | 29 | 30 | 31 | 32 |
|-------------|------------------|----------|---|---|---|---|---|---|---|---|---|----|----|----|----|----|----|----|----|----|----|----|----|----|----|----|----|----|----|----|----|----|----|----|
| Bab01       | Natick, MA       | MNE      | T | C | G | T | T | T | G | C | A | A  | T  | T  | A  | T  | T  | T  | A  | A  | A  | A  | A  | G  | A  | A  | T  | A  | C  | A  | T  | A  | T  | C  |
| Bab02       | Millis, MA       | MNE      | T | C | G | T | T | T | G | C | A | A  | T  | T  | A  | T  | T  | T  | A  | A  | A  | A  | A  | G  | A  | A  | T  | A  | C  | A  | T  | A  | T  | C  |
| Bab04       | Bedford, MA      | MNE      | T | C | G | T | T | T | G | C | A | A  | T  | T  | A  | T  | T  | T  | A  | A  | A  | A  | A  | G  | A  | A  | T  | A  | C  | A  | T  | A  | T  | C  |
| Bab07       | Unkown           | UNK      | T | C | G | T | T | T | G | C | A | A  | T  | T  | A  | T  | T  | T  | A  | A  | A  | A  | A  | G  | A  | A  | T  | A  | C  | A  | T  | A  | T  | C  |
| Bab13       | Kennebunk, ME    | MNE      | T | C | G | T | T | T | G | C | A | A  | T  | T  | A  | T  | T  | T  | A  | A  | A  | A  | A  | G  | A  | A  | T  | A  | C  | A  | T  | A  | T  | C  |
| Bab15       | Winchester, MA   | MNE      | T | C | G | T | T | T | G | C | A | A  | T  | T  | A  | T  | T  | T  | A  | A  | A  | A  | A  | G  | A  | A  | T  | A  | C  | A  | T  | A  | T  | C  |
| Bab16       | Gloucester, MA   | MNE      | T | C | G | T | T | T | G | C | A | A  | T  | T  | A  | T  | T  | T  | A  | A  | A  | A  | A  | G  | A  | A  | T  | A  | C  | A  | T  | A  | T  | C  |
| ND11        | North Dakota     | DK       | T | C | G | T | T | T | G | C | A | A  | T  | T  | A  | T  | T  | T  | A  | A  | A  | A  | A  | G  | A  | A  | T  | A  | C  | A  | T  | A  | T  | C  |
| Bab05       | Lyndeborough, NH | NH       | T | C | G | T | T | T | G | C | A | A  | T  | T  | A  | T  | C  | T  | A  | A  | G  | A  | A  | G  | A  | A  | T  | A  | C  | A  | T  | A  | T  | C  |
| bab06       | Unkown           | UNK      | T | C | G | T | T | T | G | C | A | A  | T  | T  | A  | T  | C  | T  | A  | A  | G  | A  | A  | G  | A  | A  | T  | A  | C  | A  | T  | A  | T  | C  |
| Bab03       | Topsfield, MA    | MNE      | T | C | G | T | T | T | G | C | A | A  | T  | T  | A  | C  | T  | T  | A  | A  | G  | A  | G  | G  | A  | A  | T  | A  | C  | A  | T  | A  | T  | C  |
| Bab08       | Unkown           | UNK      | T | C | G | T | T | T | G | C | A | A  | T  | T  | A  | C  | T  | T  | A  | A  | G  | A  | G  | G  | A  | A  | T  | A  | C  | A  | T  | A  | T  | C  |
| Bab10       | Stonington, CT   | CT       | T | C | G | T | T | T | G | C | A | A  | T  | T  | A  | C  | T  | T  | A  | A  | G  | A  | G  | G  | A  | A  | T  | A  | C  | A  | T  | A  | T  | C  |
| Bab12       | Unkown           | UNK      | T | C | G | T | T | T | G | C | A | A  | T  | T  | A  | C  | T  | T  | A  | A  | G  | A  | G  | G  | A  | A  | T  | A  | C  | A  | T  | A  | T  | C  |
| Bab11       | Norwell, MA      | MNE      | T | C | G | T | T | T | G | C | A | A  | T  | T  | A  | C  | T  | T  | A  | A  | G  | A  | G  | G  | A  | A  | T  | A  | C  | A  | T  | A  | T  | C  |
| RMNS1997    | Nantucket, MA    | NAN      | T | C | G | C | C | T | G | C | G | A  | T  | T  | G  | T  | T  | C  | A  | A  | G  | A  | A  | G  | A  | A  | T  | A  | C  | A  | T  | A  | T  | C  |
| Bab14       | South Dennis, MA | Cape Cod | T | C | G | C | C | T | G | C | G | A  | T  | T  | G  | T  | T  | C  | A  | A  | G  | A  | A  | G  | A  | A  | T  | A  | C  | A  | T  | A  | T  | C  |
| GI1986      | Nantucket, MA    | NAN      | T | C | G | C | C | T | G | C | G | A  | T  | T  | G  | T  | T  | C  | A  | A  | G  | A  | A  | G  | A  | A  | T  | A  | C  | A  | T  | A  | T  | C  |
| Gray        | Nantucket, MA    | NAN      | T | C | G | C | C | T | G | C | G | A  | T  | T  | G  | T  | T  | C  | A  | A  | G  | A  | A  | G  | A  | A  | T  | A  | C  | A  | T  | A  | T  | C  |
| Peabody     | Nantucket, MA    | NAN      | T | C | G | C | C | T | G | C | G | A  | T  | T  | G  | T  | T  | C  | A  | A  | G  | A  | A  | G  | A  | A  | T  | A  | C  | A  | T  | A  | T  | C  |
| RMNS-1      | Nantucket, MA    | NAN      | T | C | G | C | C | T | G | C | G | A  | T  | T  | G  | T  | T  | C  | A  | A  | G  | A  | A  | G  | A  | A  | T  | A  | C  | A  | T  | A  | T  | C  |
| GI1990      | Nantucket, MA    | NAN      | T | C | G | C | C | T | G | C | G | A  | T  | T  | G  | T  | T  | C  | A  | A  | G  | A  | A  | G  | A  | A  | T  | A  | C  | A  | T  | A  | T  | C  |
| GI2004      | Nantucket, MA    | NAN      | T | C | G | C | C | T | G | C | G | A  | T  | T  | G  | T  | T  | C  | A  | A  | G  | A  | A  | G  | A  | A  | T  | A  | C  | A  | T  | A  | T  | C  |
| MNB010      | Minnesota        | MN       | C | C | G | C | T | T | G | C | G | G  | C  | C  | G  | T  | T  | C  | G  | G  | G  | C  | G  | G  | A  | A  | C  | A  | C  | A  | T  | A  | T  | C  |
| MN-1        | Minnesota        | MN       | C | C | G | C | T | T | G | C | G | G  | C  | C  | G  | T  | T  | C  | G  | G  | G  | C  | G  | G  | A  | A  | C  | A  | C  | A  | T  | A  | T  | C  |
| W107        | Wisconsin        | WN       | C | C | G | C | T | T | G | C | G | G  | C  | C  | A  | T  | T  | C  | G  | G  | G  | C  | G  | G  | A  | A  | C  | A  | C  | A  | T  | A  | T  | C  |
