# Supplementary material for: Development of a SNP barcode to genotype Babesia microti infections
Source: PubMed Central journal article supplement (PMC6448979; doi:10.1371/journal.pntd.0007194), 2019-03-25
Supplement: pntd.0007194.s007.pdf [file pntd.0007194.s007.pdf]

| Barcode Assay | Major Allele | Minor Allele | Minor Allel frequency (MAF) |
|---------------|--------------|--------------|-----------------------------|
| 1             | T            | C            | 0.12                        |
| 2             | C            | A            | 0.00                        |
| 3             | G            | A            | 0.00                        |
| 4             | T            | C            | 0.42                        |
| 5             | T            | C            | 0.31                        |
| 6             | T            | C            | 0.00                        |
| 7             | G            | A            | 0.00                        |
| 8             | C            | T            | 0.00                        |
| 9             | A            | G            | 0.42                        |
| 10            | A            | G            | 0.10                        |
| 11            | T            | C            | 0.10                        |
| 12            | T            | C            | 0.10                        |
| 13            | A            | G            | 0.38                        |
| 14            | T            | C            | 0.19                        |
| 15            | T            | C            | 0.08                        |
| 16            | T            | C            | 0.40                        |
| 17            | A            | G            | 0.10                        |
| 18            | A            | G            | 0.10                        |
| 19            | G            | A            | 0.31                        |
| 20            | A            | G            | 0.10                        |
| 21            | A            | G            | 0.31                        |
| 22            | G            | A            | 0.00                        |
| 23            | A            | G            | 0.00                        |
| 24            | A            | G            | 0.00                        |
| 25            | T            | C            | 0.10                        |
| 26            | A            | C            | 0.00                        |
| 27            | C            | A            | 0.00                        |
| 28            | A            | G            | 0.00                        |
| 29            | T            | G            | 0.00                        |
| 30            | A            | G            | 0.00                        |
| 31            | T            | C            | 0.00                        |
| 32            | C            | T            | 0.00                        |
